# Supplementary material for: Disclosing biosynthetic connections and functions of atypical angucyclinones with a fragmented C-ring
Source: Royal Society of Chemistry journal article supplement (doi:10.1039/d0np00082e), 2021-01-01
Supplement: d0np00082e1.pdf [file d0np00082e1.pdf]

## Disclosing Biosynthetic Connections and Function of Atypical Angucyclinones with Fragmented C-Ring

Andrey A. Mikhaylov,<sup>a,b\*</sup> Viktoria Ikonnikova<sup>a</sup> and Pavel N. Sol'yev<sup>c</sup>

---

<sup>a</sup> Shemyakin-Ovchinnikov Institute of Bioorganic Chemistry of the Russian Academy of Sciences, 16/10 Miklukho-Maklaya St., Moscow, 117997, Russia; E-mail: mikhaylov\_andrey@yahoo.com

<sup>b</sup> National Research University Higher School of Economics, Faculty of Chemistry, 20 Myasnitskaya St., Moscow, 101000, Russia

<sup>c</sup> Engelhardt Institute of Molecular Biology of the Russian Academy of Sciences, 32 Vavilova St., Moscow, 119991, Russia;

### Supporting information

#### Table of contents

|                             |     |
|-----------------------------|-----|
| Structure corrections ..... | SI2 |
| References.....             | SI7 |

## Structure corrections

The entire primary NMR data for all the compounds,<sup>1-21</sup> which are presented on Figure 2 in the main manuscript, were analyzed to exclude misinterpretation and/or in search for possible match of the spectral data and thus ambiguous assignment. Mostly the performed analysis has confirmed the correct assignment. Nearly all the structures were found consistent with the NMR data presented in the literature.

The only exception of misinterpretation was Elmenol H,<sup>21</sup> which structural formula was originally established to be identical to pratensilin A<sup>8</sup> (**36**, herein and later on the numbering is identical with those in the main text) but the NMR spectra were different. Further study has revealed that spectra of Elmenol H are in perfect agreement with those for pratensilin B<sup>8</sup> (**38**) – an isomer of pratensilin A with alternative position of methoxy group. Both structures of pratensilin A **36** and pratensilin B **38** were unambiguously established by X-Ray crystallography.

Structures for the compounds **33**, **37** and **40**<sup>3</sup> were ambiguous in both terms of chemical logic and unambiguous NMR assignment. In the publication compound **33** was assigned as a hemiacetal of amide, compound **40** – as hemiaminal and compound **37** as positively charged secondary amide hemiaminal.

For the compound **40** basing on match of its spectral data with those for pratensilin A **36** the structure was reassigned.

Compound **33**, as we believe, is a normal ester, since it has signal with the usual chemical shift of ester group and does not look to form amide hemiacetal structure. HMBC correlations also do not support the original structure.

Finally, for the compound **37** a non-charged structure was required. Based on <sup>1</sup>H, <sup>13</sup>C and HMBC data (+HRMS) we have decided that the compound **37** should have very similar structure to pratensilin A **36**.

Below follows the details on such interpretations. Problematic fragments in the original structures and structure corrections are marked with color. To help the analysis the chemical shifts and the other experimental data are replicated from the primary publications.<sup>3,8,21</sup>

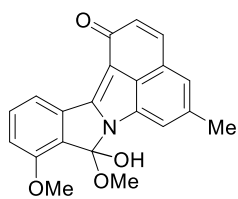

**33** (original structure)

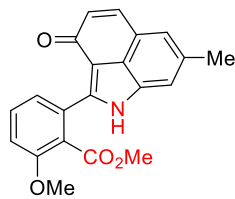

**33** (corrected structure)

$^1\text{H}$  NMR (600 MHz,  $\text{CD}_3\text{OD}$ ):<sup>3</sup>

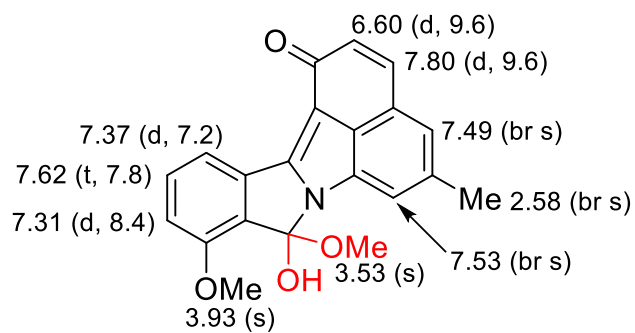

$^{13}\text{C}$  NMR (600 MHz,  $\text{CD}_3\text{OD}$ ):

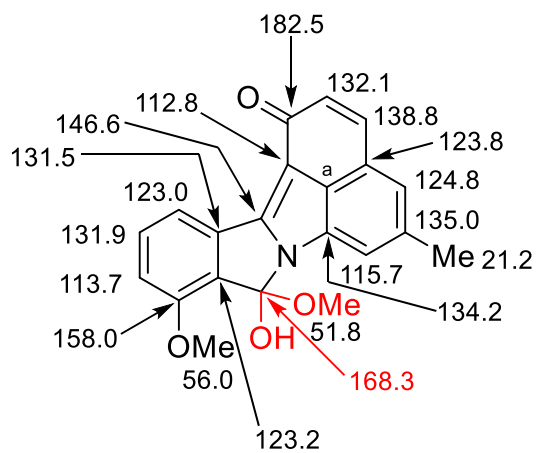

<sup>a</sup>124.8

HRMS  $[\text{M} + \text{H}]^+$  at  $m/z$  348.1255  
 $\text{C}_{21}\text{H}_{17}\text{NO}_4$  (calc'd for 347.1158).

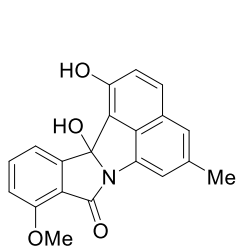

40 (original structure)

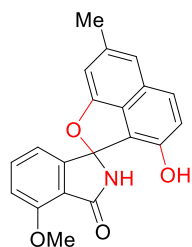

(corrected structure)  
match with Pratensilin A 36

$^1\text{H NMR}$  (600 MHz,  $\text{CD}_3\text{OD}$ ):<sup>3</sup>

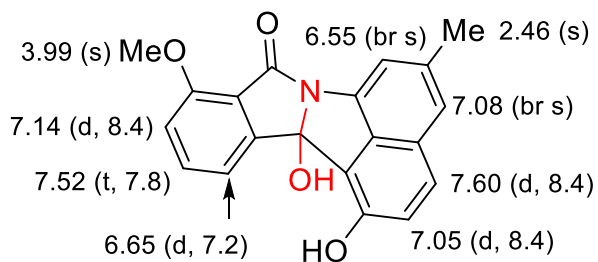

$^{13}\text{C NMR}$  (600 MHz,  $\text{CD}_3\text{OD}$ ):

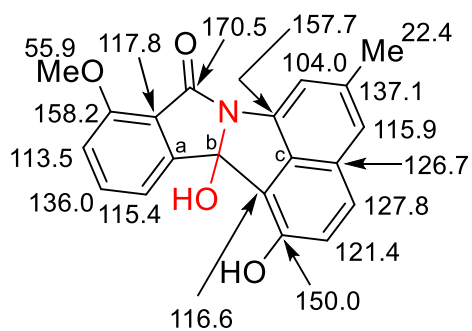

<sup>a</sup>148.8, <sup>b</sup>102.1, <sup>c</sup>129.3

(+)-HRMS  $[\text{M}+\text{H}]^+$  at  $m/z$  334.1109

(+)-HRMS  $[\text{M}+\text{Na}]^+$  at  $m/z$  356.0895.

$[\alpha]_{\text{D}}$  not given

### Pratensilin A:

$^1\text{H NMR}$  (500 MHz,  $\text{DMSO-d}_6$ ):<sup>8</sup>

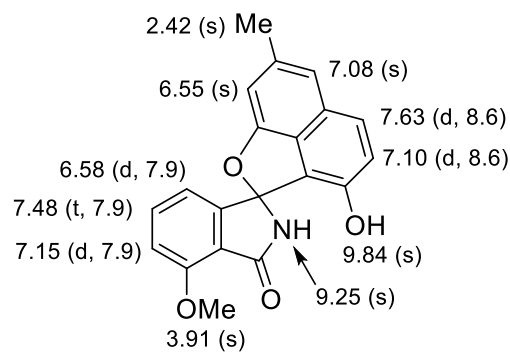

$^{13}\text{C NMR}$  (125 MHz,  $\text{DMSO-d}_6$ ):

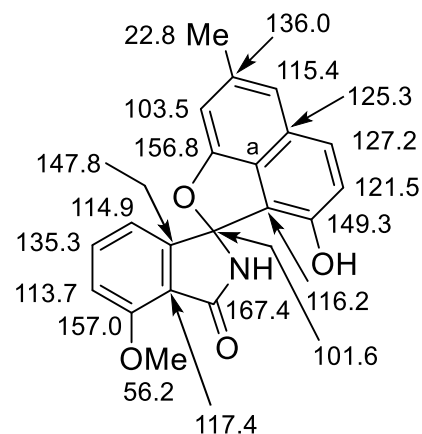

<sup>a</sup>128.5

### (+)-Pratensilin A:

HRMS  $[\text{M} + \text{Na}]^+$  at  $m/z$  356.0895 ( $\Delta$  -0.4 ppm)

$[\alpha]_{\text{D}}^{25} +7.3$  ( $c$  0.11, acetone);

### (-)-Pratensilin A:

X-RAY: CCDC 1474259

HRMS  $[\text{M} + \text{Na}]^+$  at  $m/z$  356.0895 ( $\Delta$  -0.4 ppm)

$[\alpha]_{\text{D}}^{25} -34.6$  ( $c$  0.04, acetone)

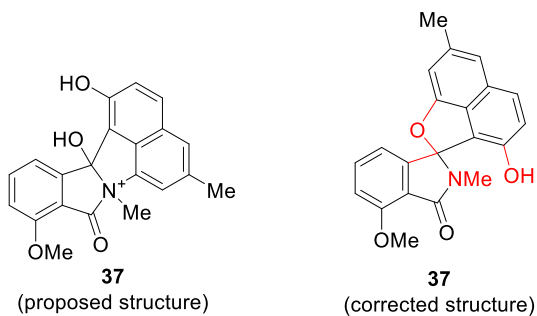

$^1\text{H NMR}$  (600 MHz,  $\text{CD}_3\text{OD}$ ):<sup>3</sup>

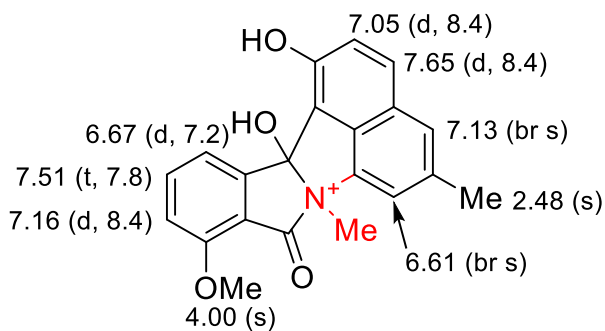

$^{13}\text{C NMR}$  (600 MHz,  $\text{CD}_3\text{OD}$ ):

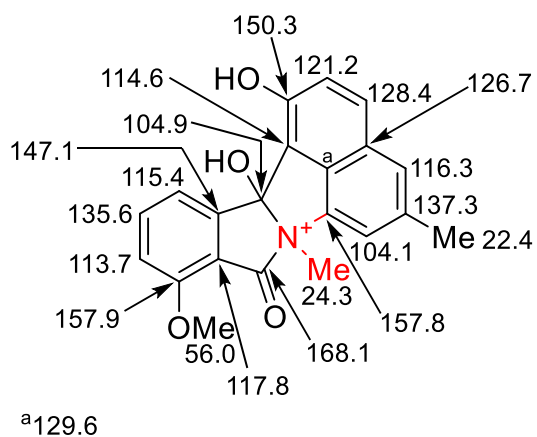

HRMS  $[\text{M}+\text{H}]^+$  at  $m/z$  348.1239  
 $\text{C}_{21}\text{H}_{18}\text{NO}_4$  (calc'd for 348.1230).

$[\alpha]_D$  not given

### Pratensilin A:

$^1\text{H NMR}$  (500 MHz,  $\text{DMSO-d}_6$ ):<sup>8</sup>

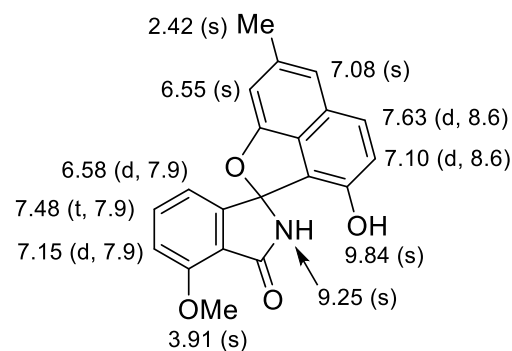

$^{13}\text{C NMR}$  (125 MHz,  $\text{DMSO-d}_6$ ):

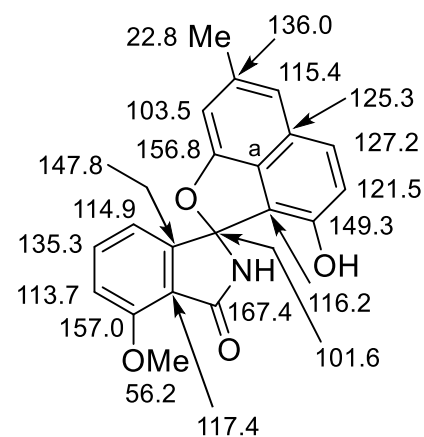

$[\alpha]_D$  128.5

### (+)-Pratensilin A:

HRMS  $[\text{M} + \text{Na}]^+$  at  $m/z$  356.0895 ( $\Delta -0.4$  ppm)

$[\alpha]_D^{25} +7.3$  ( $c$  0.11, acetone);

### (-)-Pratensilin A:

X-RAY: CCDC 1474259

HRMS  $[\text{M} + \text{Na}]^+$  at  $m/z$  356.0895 ( $\Delta -0.4$  ppm)

$[\alpha]_D^{25} -34.6$  ( $c$  0.04, acetone)

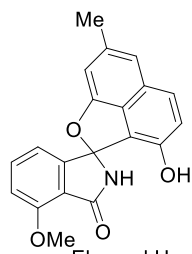

NMR do not match with  
Pratensilin A **36**

$^1\text{H NMR}$  (500 MHz, acetone- $d_6$ ):<sup>21</sup>

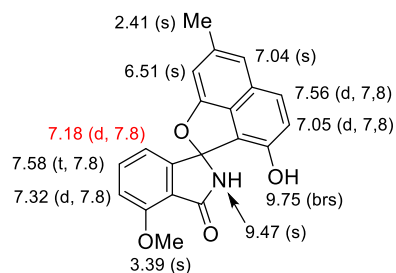

$^{13}\text{C NMR}$  (125 MHz, acetone- $d_6$ ):

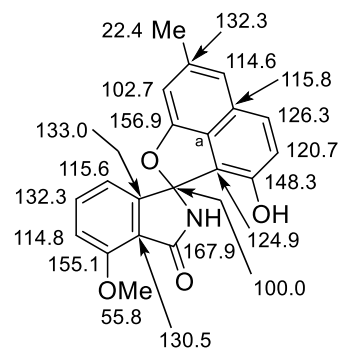

<sup>a</sup>128.4

(-)-HRESIMS  $[\text{M} - \text{H}]^-$  at  $m/z$  332.0942  
 $\text{C}_{20}\text{H}_{14}\text{NO}_4$  (calc'd for 332.0923).

$[\alpha]_D^{20} + 80.7$  ( $c$  0.06,  $\text{CH}_3\text{OH}$ );

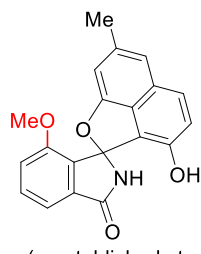

match with Pratensilin B **38**

(+)-Pratensilin B:

$^1\text{H NMR}$  (500 MHz,  $\text{DMSO}-d_6$ ):<sup>8</sup>

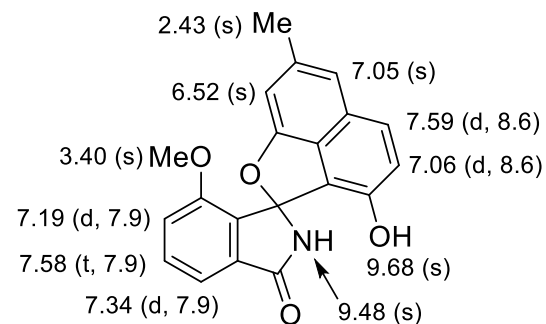

$^{13}\text{C NMR}$  (125 MHz,  $\text{DMSO}-d_6$ ):

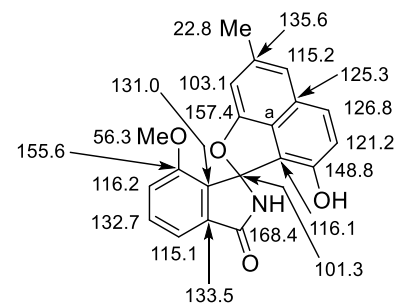

<sup>a</sup>128.8

(+)-Pratensilin B:

HRESIMS  $[\text{M} + \text{H}]^+$  at  $m/z$  334.1075 ( $\Delta$  1.3  
ppm)

$[\alpha]_D^{25} + 13.3$  ( $c$  0.11, acetone);

X-RAY: CCDC 1557858

Pratensilin A:

$^1\text{H NMR}$  (500 MHz,  $\text{DMSO}-d_6$ ):<sup>8</sup>

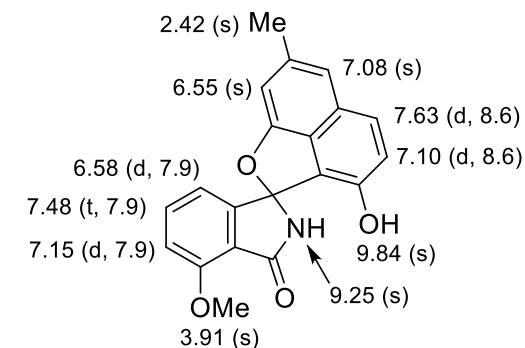

$^{13}\text{C NMR}$  (125 MHz,  $\text{DMSO}-d_6$ ):

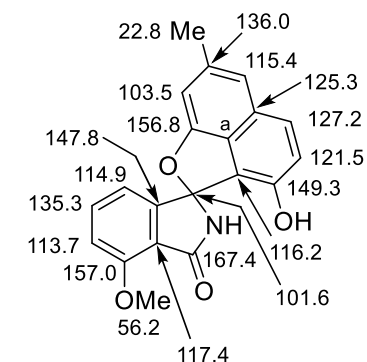

<sup>a</sup>128.5

HRMS  $[\text{M} + \text{Na}]^+$  at  $m/z$  356.0895 ( $\Delta$  -0.4 ppm)

$[\alpha]_D^{25} + 7.3$  ( $c$  0.11, acetone);

X-RAY: CCDC 1474259 (-)-Pratensilin A

## References

- (1) Gerlitz, M.; Udarnoki, G.; Rohr, J. Biosyntheses of Novel Emycins from the Mutant Strain *Streptomyces Cellulosae* Ssp. *Griseoincarnatus* 1114-2. *Angew. Chemie Int. Ed. English* **1995**, *34* (15), 1617–1621. <https://doi.org/10.1002/anie.199516171>.
- (2) Walker, M.; Pohl, E.; Herbst-Irmer, R.; Gerlitz, M.; Rohr, J.; Sheldrick, G. M. Absolute Configurations of Emycin D, E and F; Mimicry of Centrosymmetric Space Groups by Mixtures of Chiral Stereoisomers. *Acta Crystallogr. Sect. B Struct. Sci.* **1999**, *55* (4), 607–616. <https://doi.org/10.1107/S0108768199003948>.
- (3) Wu, C.; van der Heul, H. U.; Melnik, A. V.; Lübber, J.; Dorrestein, P. C.; Minnaard, A. J.; Choi, Y. H.; van Wezel, G. P. Lugdunomycin, an Angucycline-Derived Molecule with Unprecedented Chemical Architecture. *Angew. Chemie - Int. Ed.* **2019**, *58* (9), 2809–2814. <https://doi.org/10.1002/anie.201814581>.
- (4) WANG, L.; WANG, L.; ZHOU, Z.; WANG, Y. J.; HUANG, J. P.; MA, Y. T.; LIU, Y.; HUANG, S. X. Cangumycins A–F, Six New Angucyclinone Analogues with Immunosuppressive Activity from *Streptomyces*. *Chin. J. Nat. Med.* **2019**, *17* (12), 982–987. [https://doi.org/10.1016/S1875-5364\(19\)30121-9](https://doi.org/10.1016/S1875-5364(19)30121-9).
- (5) Xie, Z. P.; Zhang, H. Y.; Li, F. C.; Liu, B.; Yang, S. X.; Wang, H. P.; Pu, Y.; Chen, Y.; Qin, S. A New Isobenzofuranone Derivative from a Marine *Streptomyces* Sp. *Chinese Chem. Lett.* **2012**, *23* (8), 941–944. <https://doi.org/10.1016/j.ccllet.2012.06.001>.
- (6) Zhang, S.-M.; Zhang, H.-Y.; Yang, S.-X.; Qu, C.-L.; Xie, Z.-P.; Pescitelli, G. Isolation, Stereochemical Study, and Cytotoxic Activity of Isobenzofuran Derivatives From a Marine *Streptomyces* Sp. *Chirality* **2015**, *27* (1), 82–87. <https://doi.org/10.1002/chir.22393>.
- (7) Zhang, H.; Xie, Z.; Lou, T.; Jiang, P. Isolation, Identification, and Cytotoxicity of a New Isobenzofuran Derivative from Marine *Streptomyces* Sp. W007. *Chinese J. Oceanol. Limnol.* **2016**, *34* (2), 386–390. <https://doi.org/10.1007/s00343-015-4326-0>.
- (8) Zhang, S.; Yang, Q.; Guo, L.; Zhang, Y.; Feng, L.; Zhou, L.; Yang, S.; Yao, Q.; Pescitelli, G.; Xie, Z. Isolation, Structure Elucidation and Racemization of (+)- and (-)-Pratensilins A-C: Unprecedented Spiro Indolinone-Naphthofuran Alkaloids from a Marine: *Streptomyces* Sp. *Chem. Commun.* **2017**, *53* (72), 10066–10069. <https://doi.org/10.1039/c7cc04983h>.
- (9) Zhang, S.; Zhang, L.; Fu, X.; Li, Z.; Guo, L.; Kou, L.; Liu, M.; Xie, Z. (+)- And (-)-Actinoxocine, and Actinaphthorans A-B, C-Ring Expansion and Cleavage Angucyclinones from a Marine-Derived: *Streptomyces* Sp. *Org. Chem. Front.* **2019**, *6* (24), 3925–3928. <https://doi.org/10.1039/c9qo01154d>.
- (10) Zhang, S. M.; Zhang, L.; Kou, L. J.; Yang, Q. L.; Qu, B.; Pescitelli, G.; Xie, Z. P. Isolation, Stereochemical Study, and Racemization of (±)-Pratenone A, the First Naturally Occurring 3-(1-Naphthyl)-2-Benzofuran-1(3H)-One Polyketide from a Marine-Derived Actinobacterium. *Chirality* **2020**, *32* (3), 299–307. <https://doi.org/10.1002/chir.23178>.
- (11) Bae, M.; An, J. S.; Hong, S.-H.; Bae, E. S.; Chung, B.; Kwon, Y.; Hong, S.; Oh, K.-B.; Shin, J.; Lee, S. K.; et al. Donghaecyclinones A–C: New Cytotoxic Rearranged Angucyclinones from a Volcanic Island-Derived Marine *Streptomyces* Sp. *Mar. Drugs* **2020**, *18* (2), 121. <https://doi.org/10.3390/md18020121>.
- (12) Yang, X.; Jin, J.; Zhou, M.; Xu, Q.; Liu, F.; Zhang, Y.; Ma, M.; Yang, D. Discovery of Angucyclinone Polyketides from Marine Actinomycetes with a Genomic DNA-Based PCR Assay Targeting Type II Polyketide Synthase. *J. Chinese Pharm. Sci.* **2017**, *26* (3), 173–179. <https://doi.org/10.5246/jcps.2017.03.017>.

- (13) PUDER, C.; ZEECK, A.; BEIL, W. New Biologically Active Rubiginones from *Streptomyces* Sp. *J. Antibiot. (Tokyo)*. **2000**, *53* (4), 329–336. <https://doi.org/10.7164/antibiotics.53.329>.
- (14) Liu, T.; Jin, J.; Yang, X.; Song, J.; Yu, J.; Geng, T.; Zhang, Z.; Ma, X.; Wang, G.; Xiao, H.; et al. Discovery of a Phenylamine-Incorporated Angucyclinone from Marine *Streptomyces* Sp. PKU-MA00218 and Generation of Derivatives with Phenylamine Analogues. *Org. Lett.* **2019**, *21* (8), 2813–2817. <https://doi.org/10.1021/acs.orglett.9b00800>.
- (15) KLEINWÄCHTER, P.; SCHLEGEL, B.; GROTH, I.; HÄRTL, A.; GRÄFE, U. New Inhibitors of 3- $\alpha$ -Hydroxysteroid Dehydrogenase, 0231A and 0231B from *Streptomyces* Sp. HKI 0231. *J. Antibiot. (Tokyo)*. **2001**, *54* (6), 510–512. <https://doi.org/10.7164/antibiotics.54.510>.
- (16) Fotso, S.; Mahmud, T.; Zabriskie, T. M.; Santosa, D. A.; Sulastri; Proteau, P. J. Rearranged and Unrearranged Angucyclinones from Indonesian *Streptomyces* Spp. *J. Antibiot. (Tokyo)*. **2008**, *61* (7), 449–456. <https://doi.org/10.1038/ja.2008.61>.
- (17) Chen, C.; Song, F.; Guo, H.; Abdel-Mageed, W. M.; Bai, H.; Dai, H.; Liu, X.; Wang, J.; Zhang, L. Isolation and Characterization of LS1924A, a New Analog of Emycins. *J. Antibiot. (Tokyo)*. **2012**, *65* (8), 433–435. <https://doi.org/10.1038/ja.2012.39>.
- (18) Raju, R.; Gromyko, O.; Fedorenko, V.; Luzhetskyy, A.; Müller, R. Oleaceran: A Novel Spiro[Isobenzofuran-1,2'-Napho[1,8-Bc]Furan] Isolated from a Terrestrial *Streptomyces* Sp. *Org. Lett.* **2013**, *15* (14), 3487–3489. <https://doi.org/10.1021/ol401490u>.
- (19) Ma, M.; Rateb, M. E.; Teng, Q.; Yang, D.; Rudolf, J. D.; Zhu, X.; Huang, Y.; Zhao, L. X.; Jiang, Y.; Li, X.; et al. Angucyclines and Angucyclinones from *Streptomyces* Sp. CB01913 Featuring C-Ring Cleavage and Expansion. *J. Nat. Prod.* **2015**, *78* (10), 2471–2480. <https://doi.org/10.1021/acs.jnatprod.5b00601>.
- (20) Yixizhuoma; Tsukahara, K.; Toume, K.; Ishikawa, N.; Abdelfattah, M. S.; Ishibashi, M. Novel Cytotoxic Isobenzofuran Derivatives from *Streptomyces* Sp. IFM 11490. *Tetrahedron Lett.* **2015**, *56* (46), 6345–6347. <https://doi.org/10.1016/j.tetlet.2015.09.116>.
- (21) Yixizhuoma; Ishikawa, N.; Abdelfattah, M. S.; Ishibashi, M. Elmenols C-H, New Angucycline Derivatives Isolated from a Culture of *Streptomyces* Sp. IFM 11490. *J. Antibiot. (Tokyo)*. **2017**, *70* (5), 601–606. <https://doi.org/10.1038/ja.2016.158>.
